# Supplementary material for: The Importance of Chitosan Coatings in Dentistry
Source: MDPI journal article supplement (doi:10.3390/md21120613), 2023-11-26
Supplement: s1 [file s1]

**Table S1.** Presentation of the substances and their activity in organism to chitosan-based coatings used in dental surgery.

| Substance                                                              | Reaction                                                                                                                                                                                                                                                                               | Author (reference)                                  |
|------------------------------------------------------------------------|----------------------------------------------------------------------------------------------------------------------------------------------------------------------------------------------------------------------------------------------------------------------------------------|-----------------------------------------------------|
| Fuoride-doped diopside nanoparticles into chitosan-based coatings      | <ul style="list-style-type: none"> <li>- Highest osteoblast reaction at 60% of cell viability (among 20, 40, 60, 80 of the examined pieces)</li> <li>- Attachment on the surface improves with the amount of particles</li> <li>- Improvement of bioperformance of implants</li> </ul> | Karimi et al. [44]                                  |
| Chitosan coated iron oxide nanoparticles (IONPs) with fluconazole      | <ul style="list-style-type: none"> <li>- Biologically inert</li> <li>- Strenghtens the fluconazole reaction</li> </ul>                                                                                                                                                                 | Paulino-Gonzales et al. [45]; Caldeirao et al [46]. |
| Chitosan coated iron oxide nanoparticles (IONPs) with miconazole (MCZ) | <ul style="list-style-type: none"> <li>- miconazole activity in IONPs-CS-MCZ superior antibiofilm effect</li> </ul>                                                                                                                                                                    | Arias et al [47]                                    |
| Chitosan coated iron oxide nanoparticles (IONPs) with fluconazole      | <ul style="list-style-type: none"> <li>- No specific reaction</li> <li>- Reduced minimum inhibitory concentration of fluconazole</li> <li>- Increased antifungal value</li> </ul>                                                                                                      | de Lima et al. [16]                                 |
| Chitosan and chitosan+azithromicin                                     | <ul style="list-style-type: none"> <li>- Strenghtening of azithromicin reaction</li> <li>- suppression of biofilm (<i>Porphyromonas gingivalis</i>) formation</li> </ul>                                                                                                               | [Anggani et al. [42]                                |
| Two degrees of deacetylation (DDA) chitosan                            | <ul style="list-style-type: none"> <li>- Promotes bone healing around the implant</li> </ul>                                                                                                                                                                                           | [Alnufaiy et al. [43]                               |
| Layer by layer (LBL) coating with double layers of chitosan            | <ul style="list-style-type: none"> <li>- Increased biomineralization and osteoblastic potential</li> <li>- Anti-bacterial activity against <i>Streptococcus gordonii</i></li> </ul>                                                                                                    | Govindharajulu et al. [15]                          |
| Chitosan-ZnO coating                                                   | <ul style="list-style-type: none"> <li>- Effectiveness in fighting <i>Escherichia coli</i></li> <li>- Improved corrosion resistance</li> <li>- Good cytocompatibility in MG-63 cells</li> </ul>                                                                                        | Lin et al. [48]                                     |
| Bovine serum albumine (BSA) with addition of chitosan                  | <ul style="list-style-type: none"> <li>- Delays BSA release form bioactive glass</li> </ul>                                                                                                                                                                                            | Liu et al. [49]                                     |
| Chitosan                                                               | <ul style="list-style-type: none"> <li>- Treatment of gingivitis</li> <li>- Disinfection of dentures and prosthetic devices</li> <li>- quite stable on PMMA</li> </ul>                                                                                                                 | Walczak et al. [50]                                 |
| Chitosan and hybrid coating (TiO <sub>2</sub> /MoSe <sub>2</sub> /CHI) | <ul style="list-style-type: none"> <li>- Improved hydrophilicity, biocompatibility, osseointegration</li> </ul>                                                                                                                                                                        | Chai et al. [51]                                    |

|                                                                                                          |                                                                                                                                                                                                                                               |                                              |
|----------------------------------------------------------------------------------------------------------|-----------------------------------------------------------------------------------------------------------------------------------------------------------------------------------------------------------------------------------------------|----------------------------------------------|
|                                                                                                          | - Promoted anti-Streptococcus mutans reaction                                                                                                                                                                                                 |                                              |
| Chitosan                                                                                                 | <ul style="list-style-type: none"> <li>- Shows a high biocompatibility</li> <li>- Stable to different, extreme physical conditions (low pH) and time</li> </ul>                                                                               | Campos et al. [52]; Kalyoncuoglu et al. [53] |
| Chitosan                                                                                                 | - 15 layers of chitosan coating acts as a low cost GTR membrane                                                                                                                                                                               | Fernandes et al. [54]                        |
| Microsphere based on chitosan-coated alginate (CA) and poly(meth)acrylate-glycerin (PG) with minocycline | <ul style="list-style-type: none"> <li>- Longer carrier and bacteriostatic effect</li> <li>- No improvement in long-term treatment outcomes</li> </ul>                                                                                        | Yoon et al. [55]                             |
| Apatite-Wollastonite-Chitosan (AW-Chitosan)                                                              | <ul style="list-style-type: none"> <li>- Positively influences cell proliferation, growth and mineralization</li> <li>- longer drug sustainability did not influence the treatment</li> <li>- longer bacteriostatic effect</li> </ul>         | Murkherjee et al. [56]                       |
| Chitosan coating clotrimazole-composite sandwich nanofibres                                              | <ul style="list-style-type: none"> <li>- Antifungal (Candida albicans) activity</li> <li>- Longer time of coating results a slower release of clotrimazole</li> <li>- The antifungal effect was generally larger (faster reaction)</li> </ul> | Tonglairoum et al. [57]                      |
| Chitosan-gold nanoparticles coated titanium implants                                                     | - Chitosan increased the volume and density of newly formed bone and the osseointegration of dental implant                                                                                                                                   | Takanche [58]                                |
